# Supplementary material for: Multifunctional fluorescent Eu-MOF probe for tetracycline antibiotics and dihydrogen phosphate sensing and visualizing latent fingerprints
Source: Royal Society of Chemistry journal article supplement (doi:10.1039/d3ra00100h), 2023-01-01
Supplement: d3ra00100h1.pdf [file d3ra00100h1.pdf]

## Electronic Supplementary Information

### Multifunctional fluorescent Eu-MOF probe for tetracycline antibiotics and dihydrogen phosphate sensing and latent fingerprints visualization

Theanchai Wiwasuku<sup>a,e</sup>, Adulvit Chuaephon<sup>b</sup>, Theerapong Puangmali<sup>b</sup>,  
Jaurusup Boonmak<sup>a\*</sup>, Somlak Ittisanronnachai<sup>c</sup>, Vinich Promarak<sup>d</sup>, and Sujitra Youngme<sup>a</sup>

---

<sup>a</sup>*Materials Chemistry Research Center and Center of Excellence for Innovation in Chemistry, Department of Chemistry, Faculty of Science, Khon Kaen University, Khon Kaen 40002, Thailand.*

<sup>b</sup>*Department of Physics, Faculty of Science, Khon Kaen University, Khon Kaen 40002, Thailand.*

<sup>c</sup>*Frontier Research Center (FRC), Vidyasirimedhi Institute of Science and Technology, Rayong 21210, Thailand.*

<sup>d</sup>*Department of Materials Science and Engineering, School of Molecular Science and Engineering, Vidyasirimedhi Institute of Science and Technology, Rayong 21210, Thailand.*

<sup>e</sup>*Functional Materials and Nanotechnology Center of Excellence, Walailak University, Nakhon Si Thammarat, 80160, Thailand.*

\* *E-mail: jaurusup@kku.ac.th*

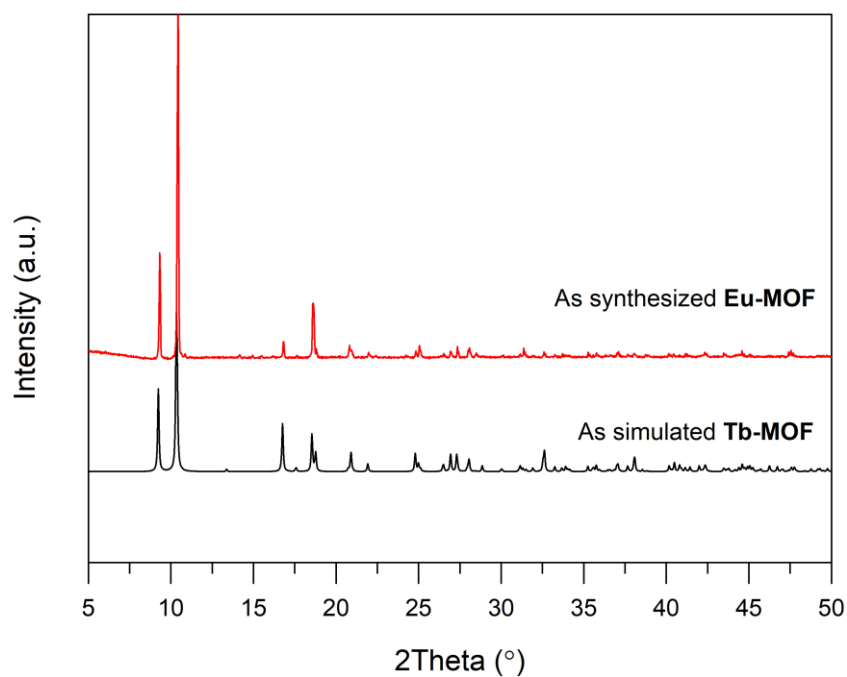

**Fig. S1.** PXRD of as simulated **Tb-MOF** and **Eu-MOF**.

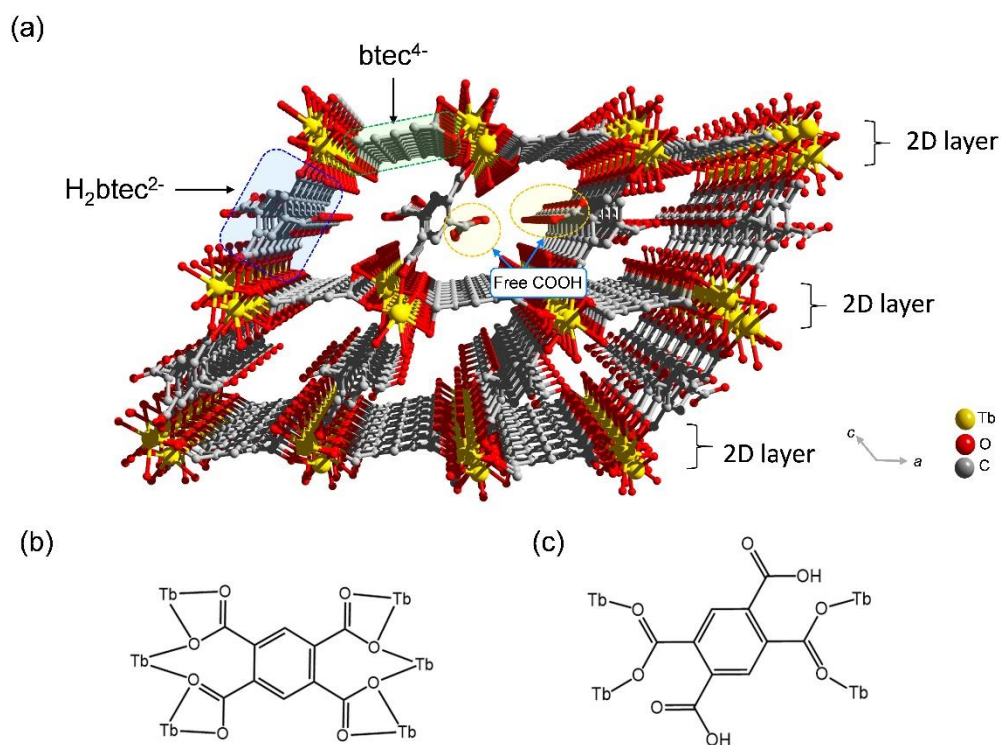

**Fig. S2** (a) View along the  $b$  axis of the three-dimensional network. Coordination modes of (b)  $\text{btec}^{4-}$  and (c)  $\text{H}_2\text{btec}^{2-}$  ligands in **Tb-MOF**.

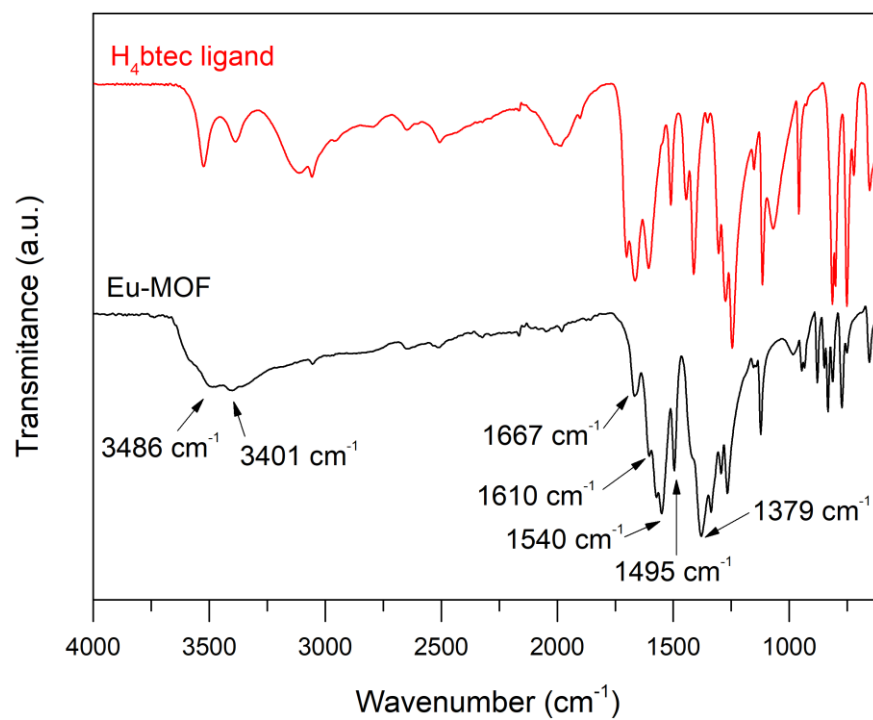

**Fig. S3** FT-IR spectrum of  $H_4bttec$  ligand and **Eu-MOF**.

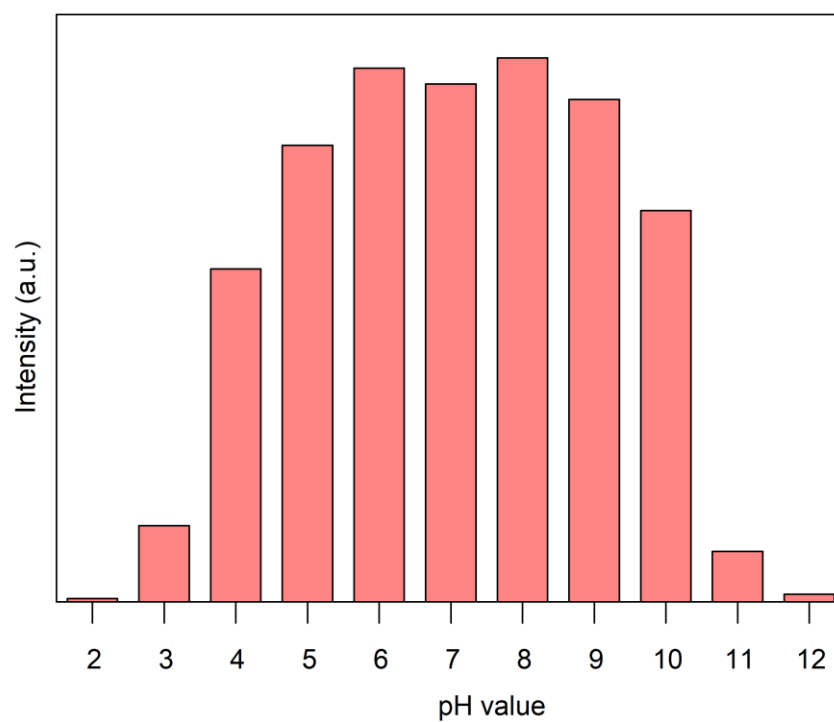

**Fig. S4** Fluorescent intensity at 616 nm of **Eu-MOF** at pH 2-12.

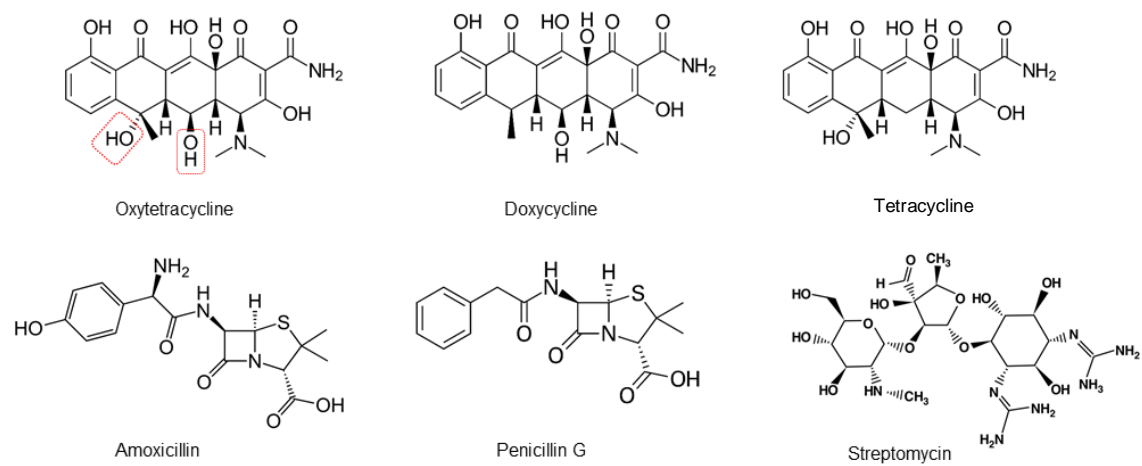

**Fig. S5** Chemical structures of the studied antibiotics.

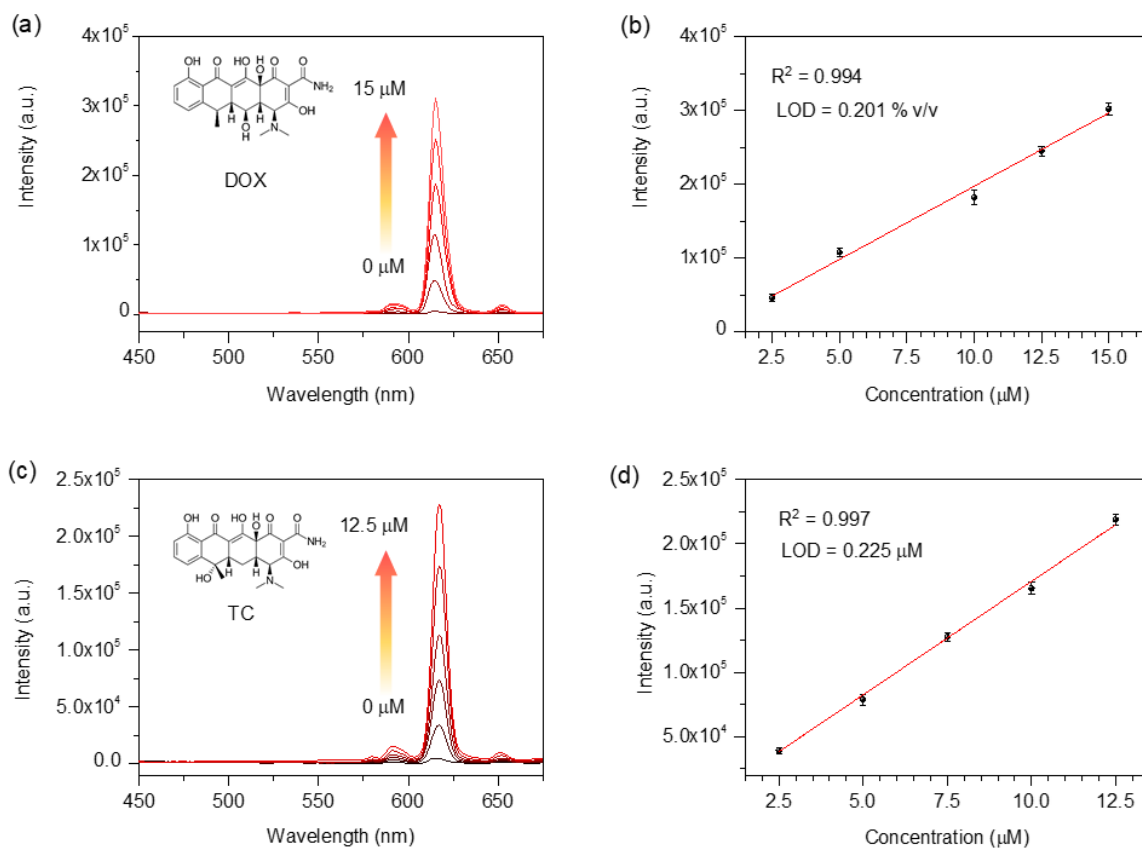

**Fig. S6** (a and c) Fluorescent spectrum of **Eu-MOF** upon addition of DOX and TC at various concentrations. (b and d) plot of the fluorescent intensity of **Eu-MOF** at 616 nm as a function of TCs concentrations.

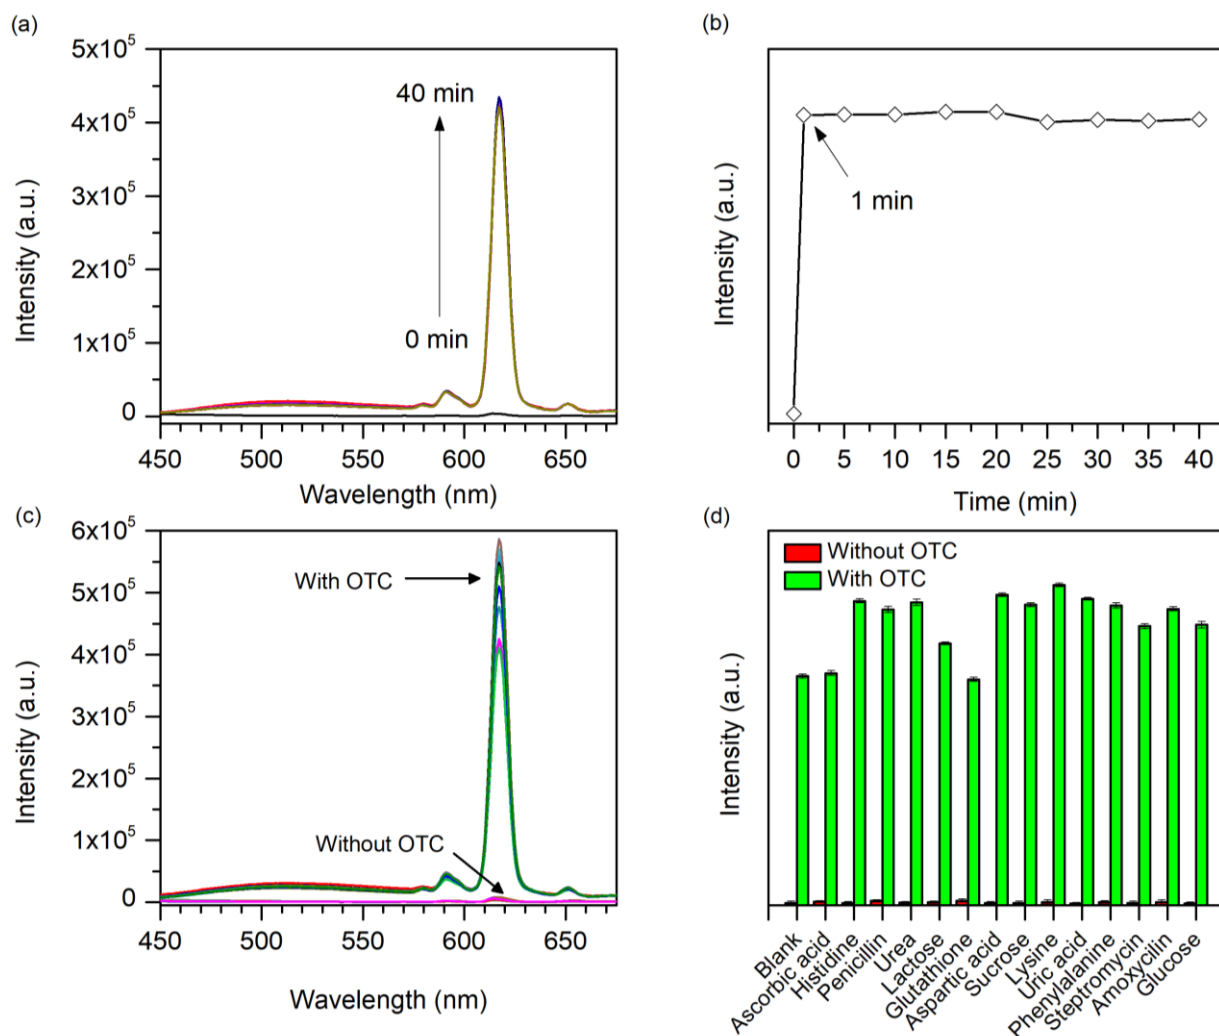

**Fig. S7** (a) Fluorescent spectra and (b) intensity at 616 nm for **Eu-MOF** in the presence of OTC (25  $\mu\text{M}$ ) as a function of time. (c) Fluorescent spectra and (d) intensity at 616 nm of **Eu-MOF** in the presence of OTC (25  $\mu\text{M}$ ) with various interference chemicals (25  $\mu\text{M}$ ).

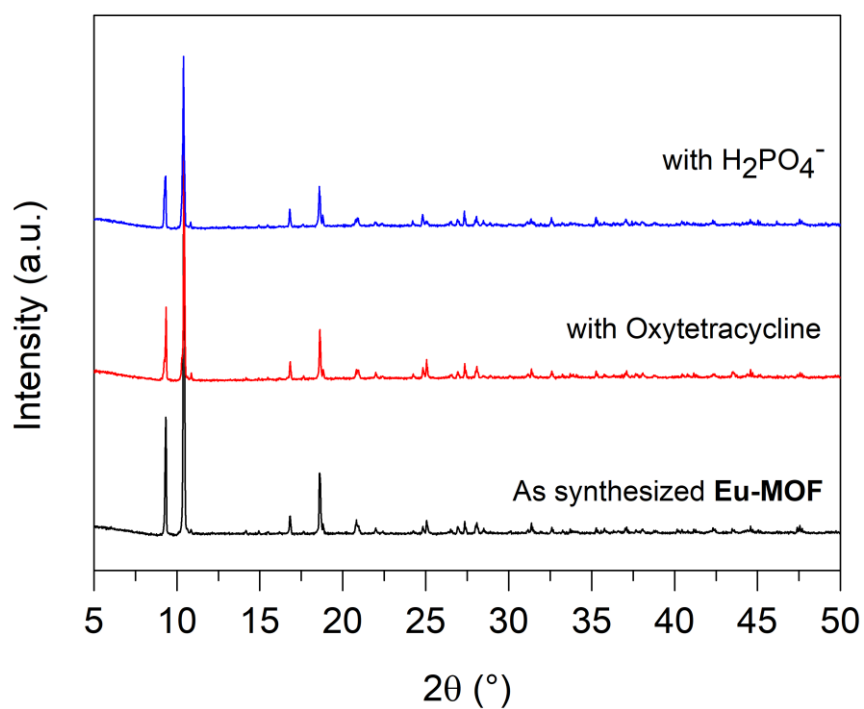

**Fig. S8** PXR D pattern of as-synthesized **Eu-MOF**, **Eu-MOF** treated with OTC, and **Eu-MOF** treated with  $\text{H}_2\text{PO}_4^-$ .

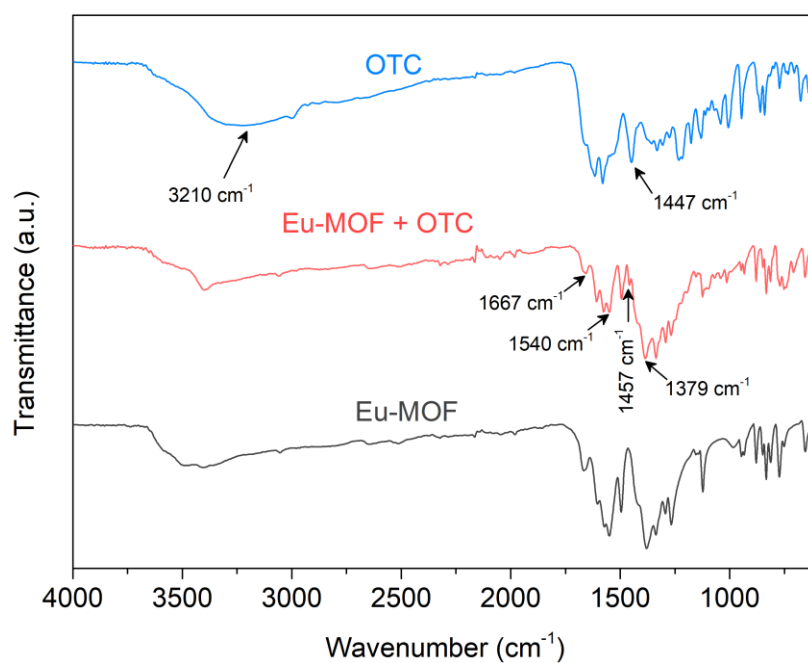

**Fig. S9** FT-IR spectra of OTC, **Eu-MOF+OTC**, and **Eu-MOF**.

**Table S1** The selected fluorescent sensors for tetracyclines (TCs) detection.

| <b>Sensor</b>               | <b>Solvent media</b> | <b>Fluorescent response</b> | <b>TCs type</b> | <b>Detection range</b> | <b>LOD</b>    | <b>Ref.</b>      |
|-----------------------------|----------------------|-----------------------------|-----------------|------------------------|---------------|------------------|
| <b>MOFs</b>                 |                      |                             |                 |                        |               |                  |
| CDs@HZIF-8                  | Water                | Ratiometric sensing         | OTC             | 0.5-40 $\mu$ M         | 29.46 nM      | [1]              |
|                             |                      |                             | TC              | 0.5-50 $\mu$ M         | 6.56 nM       |                  |
| Tb-MOF                      | Water                | Ratiometric sensing         | OTC             | 0.2- 43.0 $\mu$ M      | 43 nM         | [2]              |
|                             |                      |                             | TC              | 0.12-20.7 $\mu$ M      | 18 nM         |                  |
|                             |                      |                             | DOX             | 0.31-42.0 $\mu$ M      | 45 nM         |                  |
| NH <sub>2</sub> -MIL-53(Al) | Water                | Turn-off                    | OTC             | 0-86.67 $\mu$ M        | 62.05 nM      | [3]              |
|                             |                      |                             | TC              | 0-72.33 $\mu$ M        | 26.16 nM      |                  |
|                             |                      |                             | DOX             | 0-66.67 $\mu$ M        | 40.36 nM      |                  |
| Tb-MOF                      | Water                | Turn-off                    | OTC             | 0-50 $\mu$ M           | 1.95 nM       | [4]              |
|                             |                      |                             | TC              | 0-50 $\mu$ M           | 2.77 nM       |                  |
| Cd-MOF                      | Water                | Turn-off                    | OTC             | 0-30 $\mu$ M           | 13.53 $\mu$ M | [5]              |
|                             |                      |                             | TC              | 0-30 $\mu$ M           | 8.97 $\mu$ M  |                  |
|                             |                      |                             | DOX             | 0-30 $\mu$ M           | 11.76 $\mu$ M |                  |
| In-MOF                      | Water                | Turn-off                    | OTC             | 0-30 $\mu$ M           | 300 nM        | [6]              |
|                             |                      |                             | TC              | 0-30 $\mu$ M           | 280 nM        |                  |
| Zn-MOF                      | Water                | Turn-on                     | OTC             | 0.02–13 $\mu$ M        | 17 nM         | [7]              |
| Eu-In-BTEC                  | Water                | Turn-on                     | DOX             | 0.5-2.5 $\mu$ M        | 47 nM         | [8]              |
| <b>Eu-MOF</b>               | Water                | Turn-on                     | OTC             | 2.5-15 $\mu$ M         | 78 nM         | <b>This work</b> |
|                             |                      |                             | TC              | 2.5-12.5 $\mu$ M       | 225 nM        |                  |
|                             |                      |                             | DOX             | 2.5-15 $\mu$ M         | 201 nM        |                  |
| <b>Other materials</b>      |                      |                             |                 |                        |               |                  |
| Cu-CDs                      | Water                | Turn-off                    | OTC             | 2–44 $\mu$ M           | 160 nM        | [9]              |
|                             |                      |                             | TC              | 2-32 $\mu$ M           | 170 nM        |                  |
| AuNCs                       | Water                | Turn-on                     | OTC             | 0.375–12.5 $\mu$ M     | 150 nM        | [10]             |
| BNQD/Eu <sup>3+</sup>       | Water                | Turn-off                    | OTC             | 0-50 $\mu$ M           | 104 nM        | [11]             |
|                             |                      |                             | TC              | 0-50 $\mu$ M,          | 19 nM         |                  |
|                             |                      |                             | DOX             | 0-50 $\mu$ M           | 28 nM         |                  |



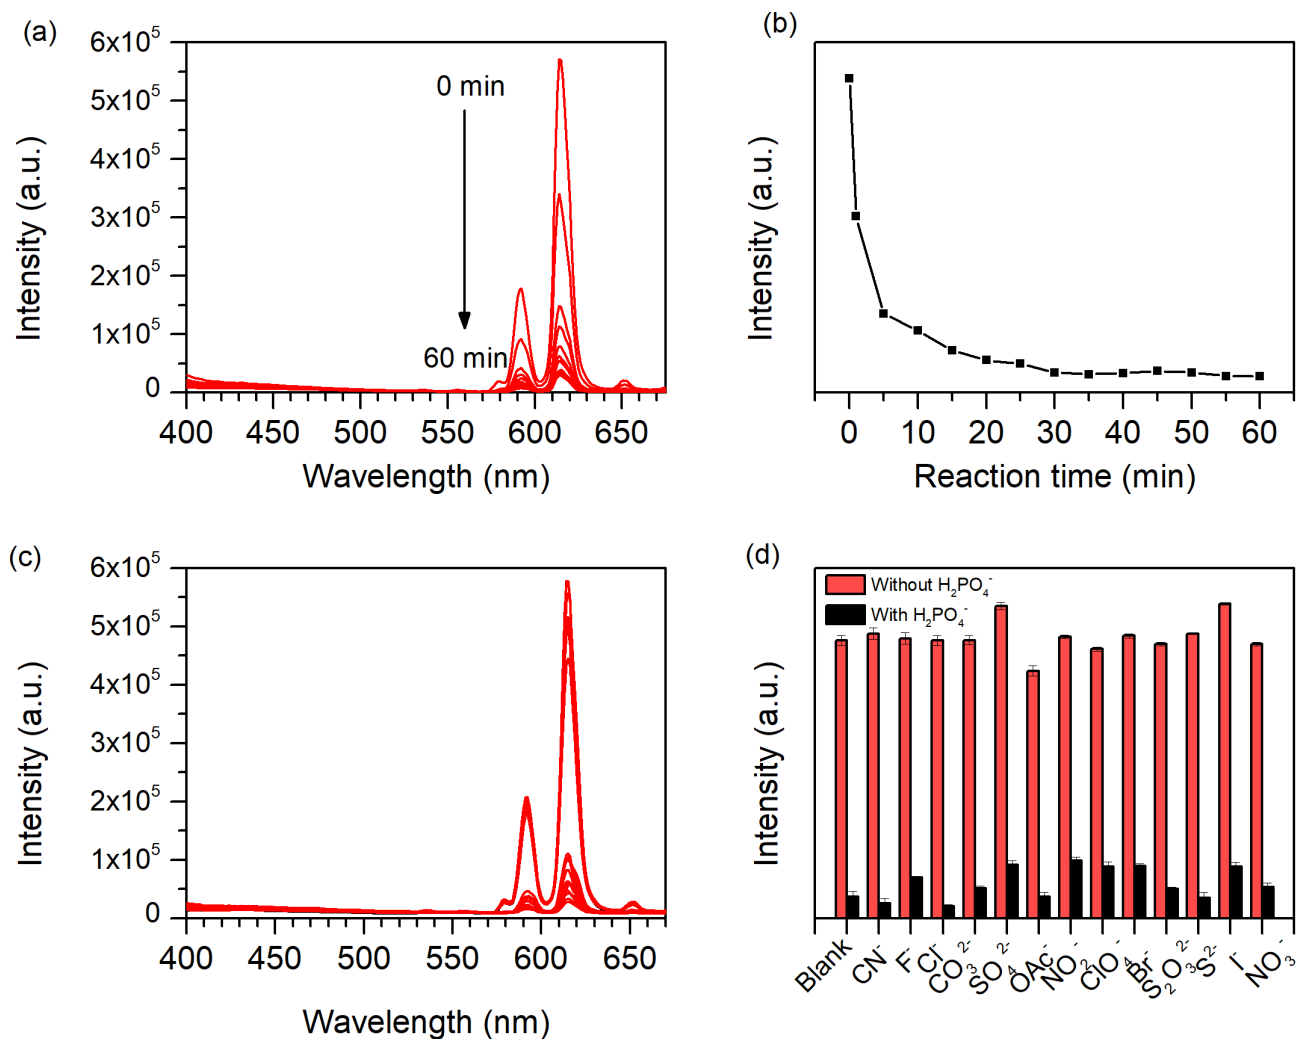

**Fig. S10** (a) Fluorescent spectra and (b) intensity at 616 nm for **Eu-MOF** in the presence of  $\text{H}_2\text{PO}_4^-$  (50  $\mu\text{M}$ ) as a function of time. (c) Fluorescent spectra and (d) intensity at 616 nm of **Eu-MOF** in the presence of  $\text{H}_2\text{PO}_4^-$  (50  $\mu\text{M}$ ) with various interference chemicals (50  $\mu\text{M}$ ).

**Table S2** The selected fluorescent sensors for H<sub>2</sub>PO<sub>4</sub><sup>-</sup> detection.

| MOF                                        | Solvent<br>media      | Fluorescent<br>response | Detection<br>range | LOD      | Ref.             |
|--------------------------------------------|-----------------------|-------------------------|--------------------|----------|------------------|
| <b>MOFs</b>                                |                       |                         |                    |          |                  |
| Zn-DMBI                                    | MeOH                  | Turn-on                 | 0-8 μM             | 1.3 μM   | [12]             |
| Pyrene tagged<br>UiO-66-NH <sub>2</sub>    | DI                    | Turn-on                 | -                  | 0.73 μM  | [13]             |
| Zn-MOF                                     | CH <sub>3</sub> OH/DI | Turn-off                | -                  | 3.903 μM | [14]             |
| <b>Eu-MOF</b>                              | DI                    | Turn-off                | 2.5-15 μM          | 0.70 μM  | <b>This work</b> |
| <b>Other materials</b>                     |                       |                         |                    |          |                  |
| Tb complex                                 | DI                    | Turn-off                | -                  | 4.82 μM  | [15]             |
| 2-(2'-tosylamido<br>phenyl)thiazole        | EtOH                  | Turn-off                | -                  | 1 μM     | [16]             |
| Zn coordinated<br>pyridine based<br>sensor | CH <sub>3</sub> CN    | Turn-off                | -                  | 3.44 μM  | [17]             |

## References

- [1] Y. Li, Y. Wang, P. Du, L. Zhang, Y. Liu, X. Lu, Fabrication of carbon dots@hierarchical mesoporous ZIF-8 for simultaneous ratiometric fluorescence detection and removal of tetracycline antibiotics. *Sens. Actuators B Chem.*, 358, **2022**, 131526.
- [2] R. Li, W. Wang, E.-S. M. El-Sayed, K. Su, P. He, and D. Yuan, Ratiometric fluorescence detection of tetracycline antibiotic based on a polynuclear lanthanide metal–organic framework. *Sens. Actuators B Chem.*, 330, **2021**, 129314.
- [3] C. Li, L. Zhu, W. Yang, X. He, S. Zhao, X. Zhang, W. Tang, J. Wang, T. Yue, Z. Li, Amino functionalized Al MOF for fluorescent detection of tetracyclines in milk. *J. Agric. Food Chem.*, 67 (4), **2019**, 1277-1283.
- [4] C. Li, C. Zeng, Z. Chen, Y. Jiang, H. Yao, Y. Yang, W.- T. Wong, *J. Hazard. Mater.*, 384, **2020**, 121498.
- [5] H.-H. Wang, Y. Zhang, D.-B. Yang, L. Hou, Z.-Y. Li, Y.-Y. Wang, Fluorine-Substituted Regulation in Two Comparable Isostructural Cd(II) Coordination Polymers: Enhanced

- Fluorescence Detection for Tetracyclines in Water, *Cryst. Growth Des.*, **2021**, 21, 2488–2497.
- [6] Q. Liu, D. Ning, W.J. Li, X.M. Du, Q. Wang, Y. Li, W. J. Ruan, Metal-organic framework-based fluorescent sensing of tetracycline-type antibiotics applicable to environmental and food analysis, *Analyst*, 144, **2019**, 1916–1922.
- [7] J. Chen, F. Xu, Q. Zhang, S. Li, X. Lu, Tetracycline antibiotics and  $\text{NH}_4^+$  detection by Zn-organic framework fluorescent probe, *Analyst*, **2021**, 146, 6883–6892.
- [8] L. Yu, H. Chen, J. Yue, X. Chen, M.i Sun, J. Hou, K. A. Alamry, H. M. Marwani, X. Wang, S.Wang, Europium metal-organic framework for selective and sensitive detection of doxycycline based on fluorescence enhancement. *Talanta*, **2020**, 207, 120297.
- [9] J. Guo, W. Lu, H. Zhang, Y. Meng, F. Du, S. Shuang, C. Dong, Copper doped carbon dots as the multifunctional fluorescent sensing platform for tetracyclines and pH. *Sens. Actuators B Chem.*, 330, **2021**, 129360.
- [10] S. Xu, X. Li, Y. Mao, T. Gao, X. Feng, X. Luo, Novel dual ligand co functionalized fluorescent gold nanoclusters as a versatile probe for sensitive analysis of  $\text{Hg}^{2+}$  and oxytetracycline. *Anal. Bioanal. Chem.* 408 (11), **2016**, 2955-2962.
- [11] K. Yang, P. Jia, J. Hou, T. Bu, X. Sun, Y. Liu, L. Wang, Innovative dual emitting ratiometric fluorescence sensor for tetracyclines detection based on boron nitride quantum dots and europium ions. *ACS Sustainable Chem. Eng.*, 8 (46), **2020**, 17185-17193.
- [12] J. Swati, J. N. Moorthy, Zwitterionic Luminescent 2D Metal–Organic Framework Nanosheets (LMONs): Selective Turn-On luorescence Sensing of Dihydrogen Phosphate. *Inorg. Chem.*, 61, **2022**, 3942–3950.
- [13] R. Dalapati, S. Biswas, Chemical Post-Synthetic Modification of a Metal-Organic Framework with Fluorescent-Tag for Dual Naked-Eye Sensing in Aqueous Medium. *Sensors Actuators B. Chem.*, 239, **2017**, 759–767.
- [14] R. Naskar, K. Bhanja, A. K.; Paul, S.; Pal, K.; Sinha, C. Trace Quantity Detection of  $\text{H}_2\text{PO}_4^-$  by Fluorescent Metal–Organic Framework (F-MOF) and Bioimaging Study. *Cryst. Growth Des.*, 20, **2020**, 6453–6460.
- [15] Y. Su, D. Zhang, P. Jia, W. Gao, Y. Li, Z. Bai, X. Liu, Q. Deng, J. Xu, C. Yang, Highly Selective and Sensitive Long Fluorescence Lifetime Polyurethane Foam Sensor Based on Tb-Complex as Chromophore for the Detection of  $\text{H}_2\text{PO}_4^-$  in Water. *Spectrochim. Acta Part A Mol. Biomol. Spectrosc.*, 217, **2019**, 86–92.
- [16] M. An, B.-Y. Kim, H. Seo, A. Helal, H.-S. Kim, Fluorescence Sensor for Sequential Detection of Zinc and Phosphate Ions. *Spectrochim. Acta - Part A Mol. Biomol. Spectrosc.*, 169, **2016**, 87–94.
- [17] X. Feng, Y. Fu, J. Jin, J. Wu, A Highly Selective and Sensitive Fluorescent Sensor for Relay Recognition of  $\text{Zn}^{2+}$  and  $\text{HSO}_4^{2-}/\text{H}_2\text{PO}_4^-$  with “on-off” Fluorescent Responses. *Anal. Biochem.*, 563, **2018**, 20–24.

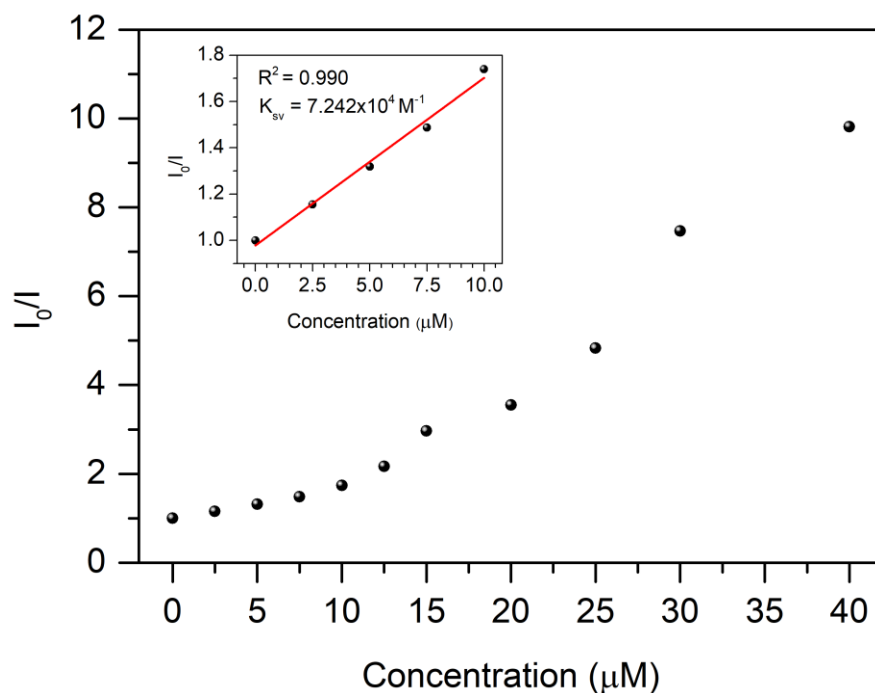

**Fig. S11** Stern-Volmer plot for **Eu-MOF** in the presence of  $\text{H}_2\text{PO}_4^-$  at various concentrations.

The inset figure displays a linear regression curve for 0-10  $\mu\text{M}$   $\text{H}_2\text{PO}_4^-$ .

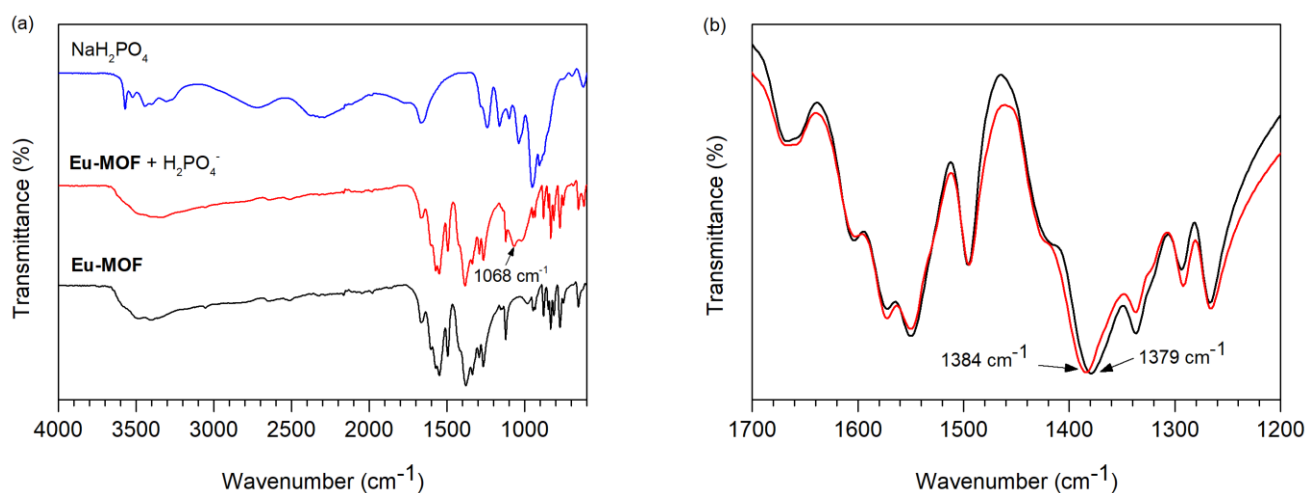

**Fig. S12** (a) FT-IR spectrum of  $\text{NaH}_2\text{PO}_4$ , **Eu-MOF** and **Eu-MOF** +  $\text{H}_2\text{PO}_4^-$ . (b) Magnified FT-IR spectrum of **Eu-MOF** (black line) and **Eu-MOF** +  $\text{H}_2\text{PO}_4^-$  (red line).

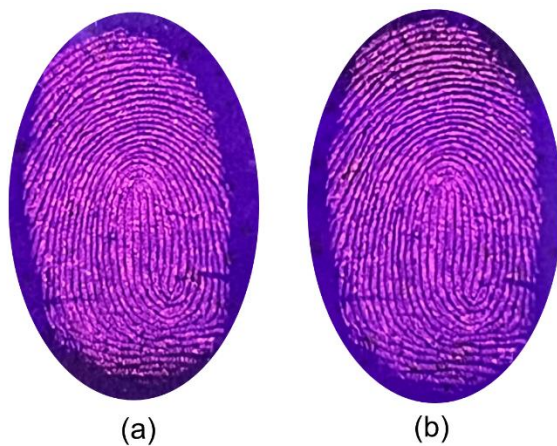

**Fig. S13** Photostability image of **Eu-MOF** developed LFPs after UV (365 nm) irradiation for (a) 0 hr and (b) 7 hrs.

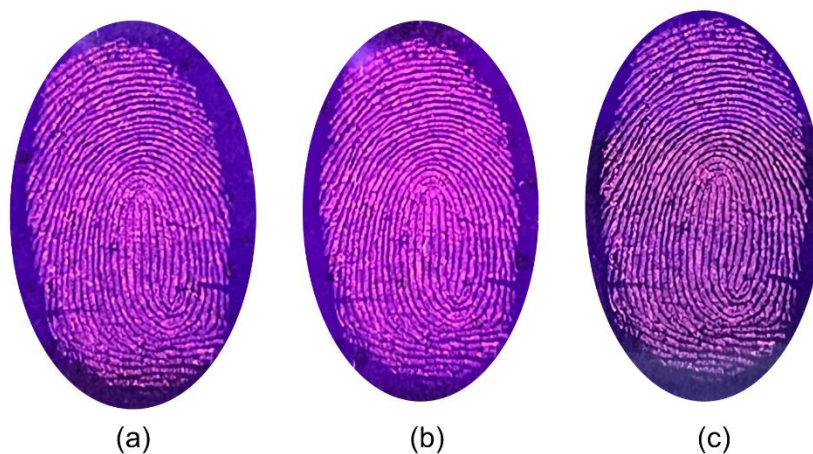

**Fig. S14** Long-term stability image of **Eu-MOF** developed LFPs after storage for (a) 0 day, (b) 7 days, and (c) 30 days.

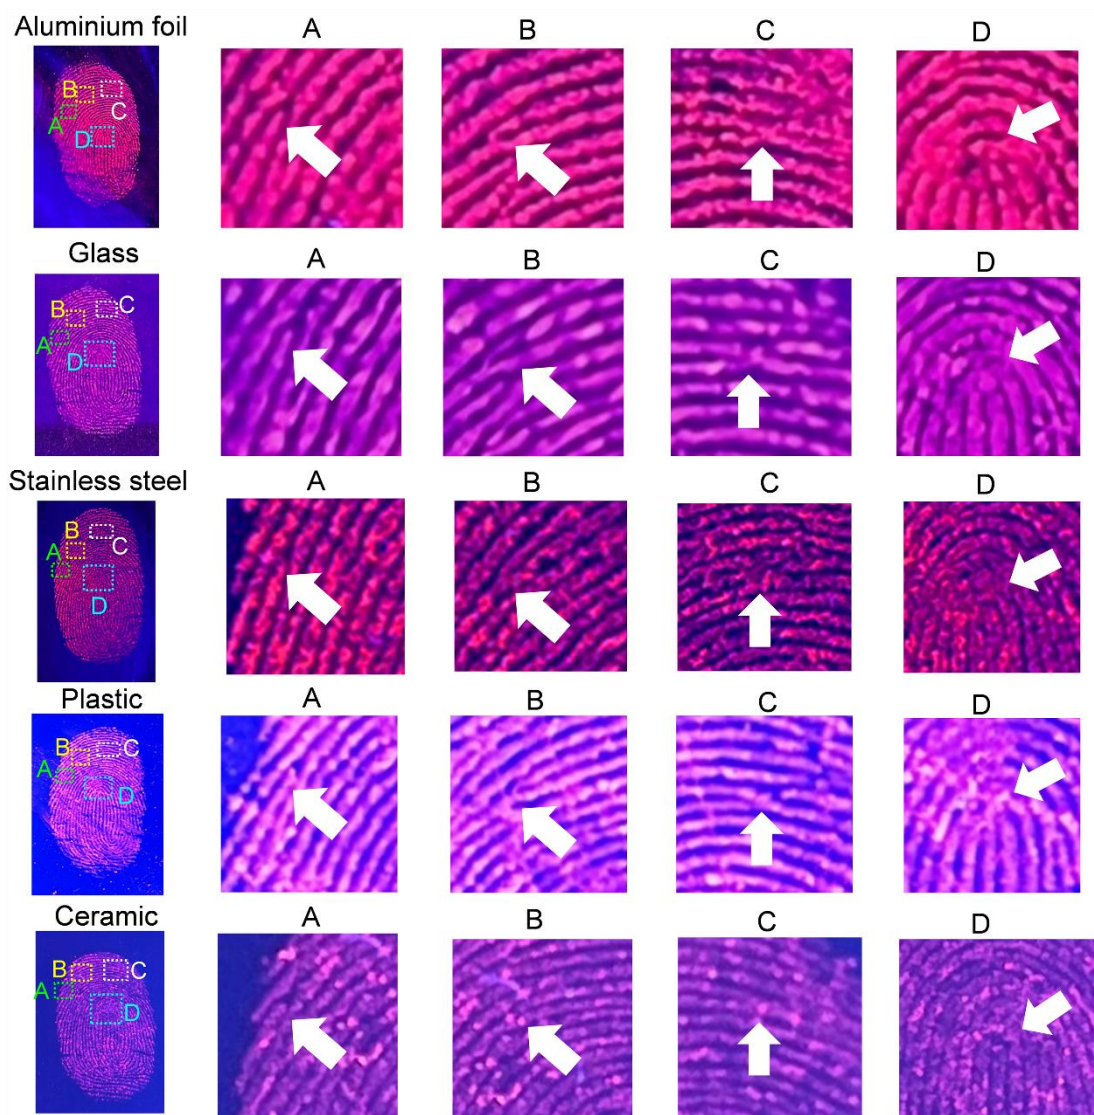

**Fig. 15** Enlarged images of latent fingerprints developed with materials on different substrates under UV light. The magnified fingerprint details show (A) termination, (B) bifurcation, (C) crossover, and (D) core point.
